# Supplementary material
Source: publisher figshare collection journal article supplement (https://acs.figshare.com/ndownloader/files/3925054)
Supplement: Supplementary file 1 [file 3925054]

Supporting information for

## Kinetics of irreversible chain adsorption

Caroline Housmans,<sup>1</sup> Michele Sferrazza<sup>2</sup> and Simone Napolitano<sup>1\*</sup>

<sup>1</sup> Laboratory of Polymer and Soft Matter Dynamics, Faculté des Sciences, Université Libre de Bruxelles, Boulevard du Triomphe, Bruxelles 1050, Belgium

<sup>2</sup> Département de Physique, Faculté des Sciences, Université Libre de Bruxelles, Boulevard du Triomphe, Bruxelles 1050, Belgium

contact: [snapolit@ulb.ac.be](mailto:snapolit@ulb.ac.be) (SN)

A series of films whose thickness covered the entire investigated range was analyzed also via atomic force microscopy. We scratched the surface of the films with a soft pen that removed the organic layer without damaging the inorganic substrate, see Figure 1. We obtained topography images in tapping mode, to avoid any impact of the AFM tip on the polymer surface.

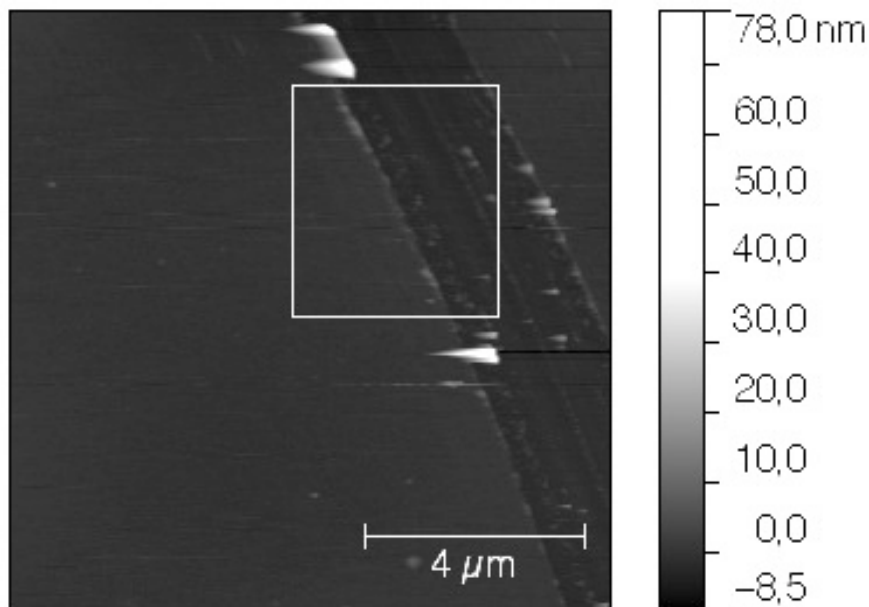

**Figure S1**

The thickness of the polymer layer was determined considering the distribution of distances plane parallel to the surface, placed at an arbitrary quota, see sketch in Figure S2 and Figure S3. The difference between the maxima in the two peaks (indicating the distribution of distance between the measuring plane and the substrate and between the measuring plane and the polymer surface) provided the mean value of the thickness of the film.

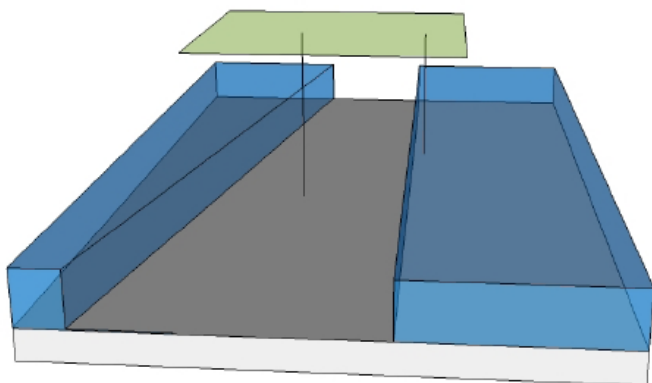

**Figure S2**

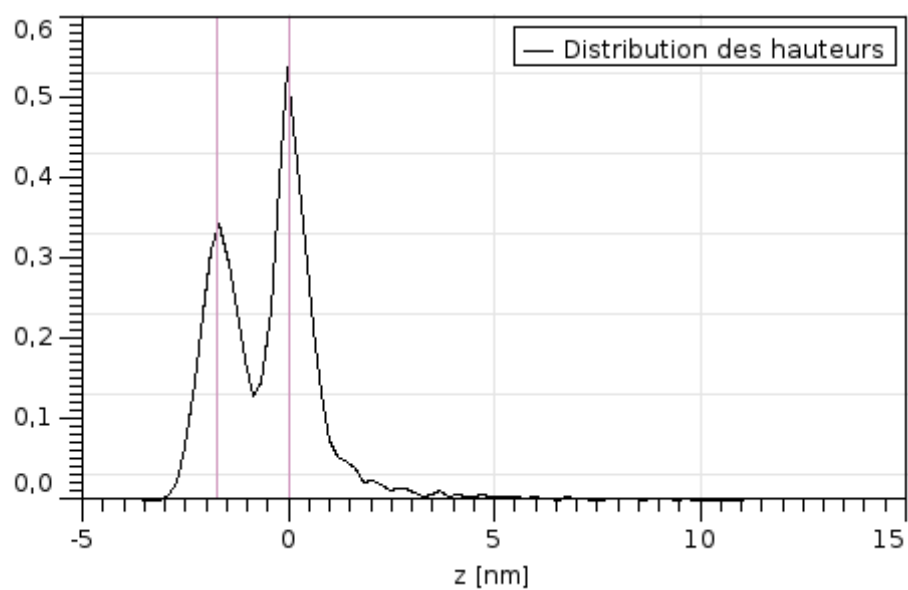

**Figure S3**

### Further fitting results

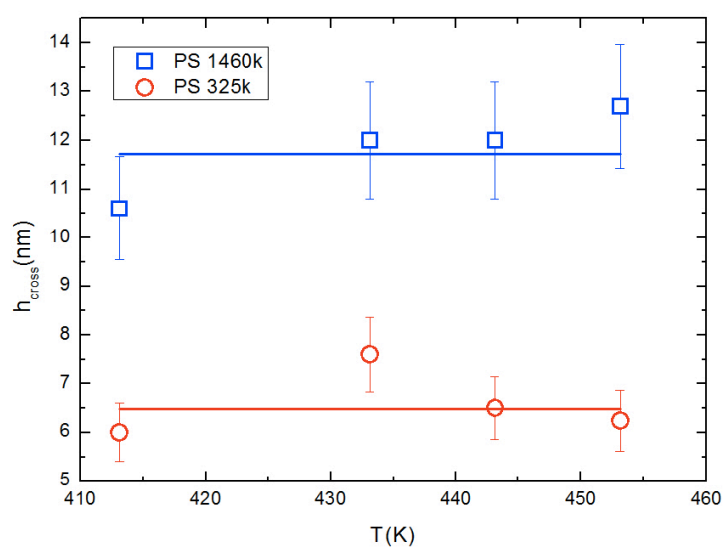

**Figure S4** Lack of temperature dependence for  $h_{\text{cross}}$ .

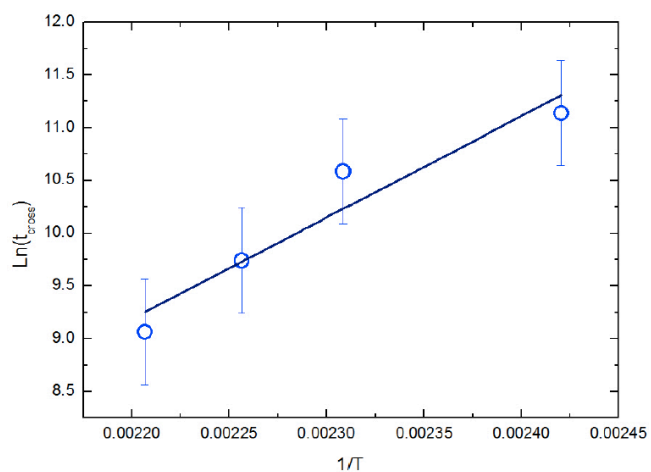

**Figure S5** Activation plot for the crossover time.

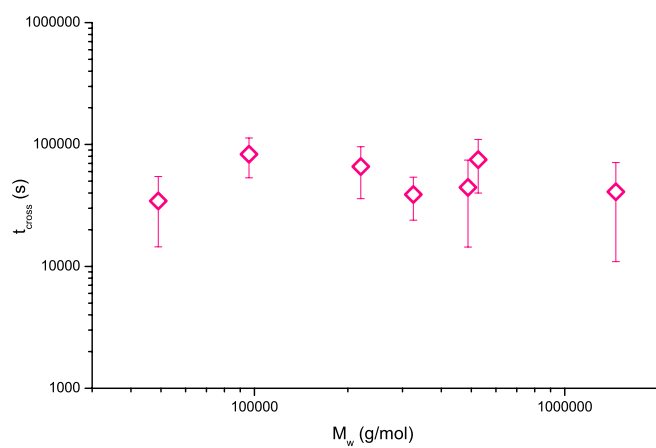

**Figure S6** Molecular weight dependence of the crossover time.
